# Supplementary material
Source: Springer Nature journal article supplement (https://www.springermedizin.de/resource/supplementary/13075_2004_1366_MOESM4_ESM.pdf/9689614)

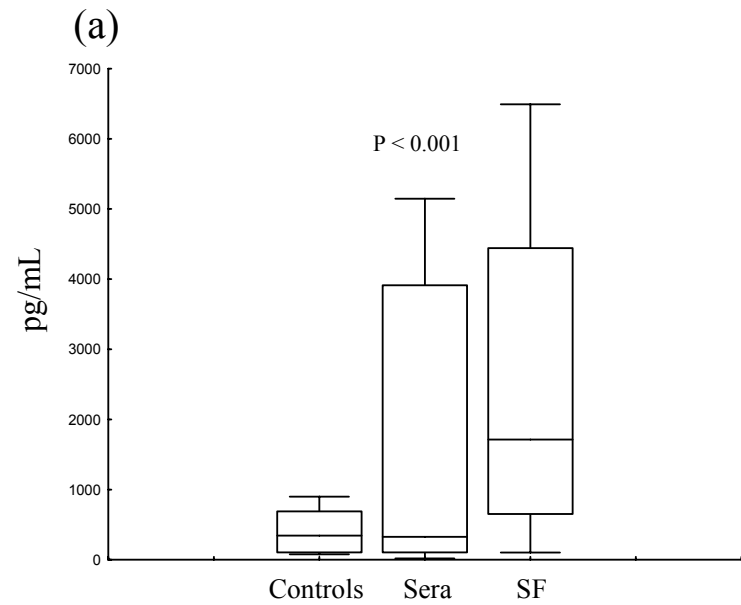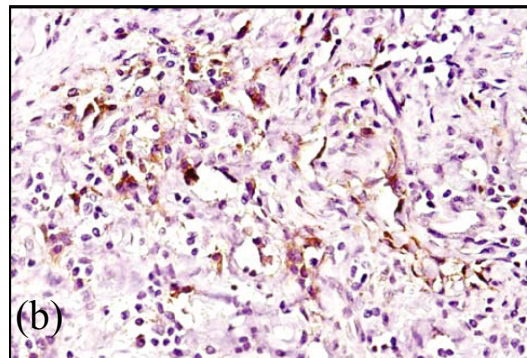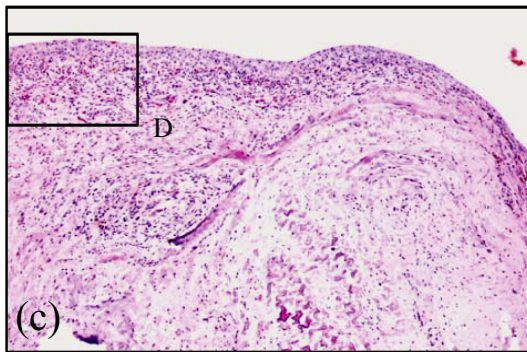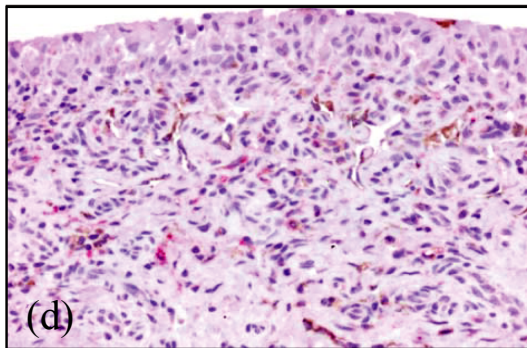

Supplement: MOESM4 [file 9689614]
